# Supplementary material for: Foliage of Tropical Trees and Shrubs and Their Secondary Metabolites Modify In Vitro Ruminal Fermentation, Methane and Gas Production without a Tight Correlation with the Microbiota
Source: MDPI journal article supplement (doi:10.3390/ani12192628), 2022-09-30
Supplement: s1 [file s1]

**Supplemental Table S1.** List of primers used for the quantification of microbial populations by ddPCR

| Primer name      | Primer Sequence                  | Amplicon size        | Target group                                                                                                                                                       | Reference                    |
|------------------|----------------------------------|----------------------|--------------------------------------------------------------------------------------------------------------------------------------------------------------------|------------------------------|
| 16S bacteria Fwd | 5'GACTCCTACGGGAGGCAG3'           | From 175 to 200 pb   | $\alpha$ -bacteria<br>$\gamma$ -bacteria<br>Firmicutes Bacteroidetes<br>Actinobacteria <i>etc.</i>                                                                 | Petrova <i>et al.</i> [1]    |
| 16S bacteria Rev | 5'GTATTACCGCGGCTGCTG3'           |                      |                                                                                                                                                                    |                              |
| 23S bacteria Fwd | 5'GAGTAGGACGGAGCACGAG3'          | 161 pb               | $\alpha$ -bacteria<br>$\gamma$ -bacteria<br>Firmicutes Bacteroidetes<br>Actinobacteria <i>etc.</i>                                                                 | Petrova <i>et al.</i> [1]    |
| 23S bacteria Rev | 5'CTTGTACGCATACGGTTTCAG3'        |                      |                                                                                                                                                                    |                              |
| 16S archaea Fwd  | 5'AATTGGCGGGGGAGCAC3'            | From 137 to 144 pb   | Archaeas:<br>Euryarchaeota and<br>Crenarchaeota<br>including:<br><i>Methanosphaera stadtmanae</i> ,<br><i>Methanobrevibacter</i> sp.,<br><i>Methanosarcina</i> sp. | Bayer <i>et al.</i> [2]      |
| 16S archaea Rev  | 5'GGCCATGCACCWCCTCTC3'           |                      |                                                                                                                                                                    |                              |
| 16S RO Fwd       | 5'GGGGCTAATACCGGATAGATGATT3'     | 459 bp               | <i>Methanobrevibacter</i> RO group that includes: <i>M. ruminantium</i> , <i>M. olleyae</i>                                                                        | Danielsson <i>et al.</i> [3] |
| 16S RO Rev       | 5'CGACCTCAAGTTCAACAGTATCAC3'     |                      |                                                                                                                                                                    |                              |
| 16S SGMT Fwd     | 5'TCCGTAGCCGGTTTAATAAGTCT3'      | From 611 to 614 pb   | <i>Methanobrevibacter</i> SGMT group that includes: <i>M. smithii</i> , <i>M. gottschalkii</i> , <i>M. millerae</i> , <i>M. thaueri</i>                            | Danielsson <i>et al.</i> [3] |
| 16S SGMT Rev     | 5'TTCCTCCTATTTATCATAGGCGG3'      |                      |                                                                                                                                                                    |                              |
| <i>mrcA</i> Fwd  | 5'TTCGGTGGATCDCARAGRGC3'         | 160 bp               | <i>methyl co-enzyme M reductase alpha subunit (mcrA)</i> gene                                                                                                      | Denman <i>et al.</i> [4]     |
| <i>mrcA</i> Rev  | 5'GBARGTCGWAWCCGTAGAATCC3'       |                      |                                                                                                                                                                    |                              |
| 18S fungi Fwd    | 5'GAGGAAGTAAAAGTCGTAACAAGGTTTC3' | From 110 to 188 pb   | Mainly anaerobic fungi including <i>Neocallimastix</i> sp., <i>Orpinomyces</i> sp., <i>Anaeromyces</i> sp.                                                         | Denman and McSweeney [5]     |
| 18S fungi Rev    | 5'CAAATTCACAAAGGGTAGGATGATT3'    |                      |                                                                                                                                                                    |                              |
| 18S protozoa Fwd | 5'CTTTCGATGGTAGTGTATTGGACTAC3'   | From 1363 to 1459 bp | Several protozoa including <i>Epiphyllum</i> sp.                                                                                                                   | Karnati <i>et al.</i> [6]    |
| 18S protozoa Rev | 5'TGATCCTTCTGCAGGTTACCTAC3'      |                      |                                                                                                                                                                    |                              |

## References

1. Petrova, O. E.; Garcia-Alcalde, F.; Zampaloni, C.; Sauer, K. Comparative Evaluation of RRNA Depletion Procedures for the Improved Analysis of Bacterial Biofilm and Mixed Pathogen Culture Transcriptomes. *Sci Rep* **2017**, *7* (1), 41114. <https://doi.org/10.1038/srep41114>.
2. Bayer, K.; Kamke, J.; Hentschel, U. Quantification of Bacterial and Archaeal Symbionts in High and Low Microbial Abundance Sponges Using Real-Time PCR. *FEMS Microbiol Ecol* **2014**, *89* (3), 679–690. <https://doi.org/10.1111/1574-6941.12369>.
3. Danielsson, R.; Dicksved, J.; Sun, L.; Gonda, H.; Müller, B.; Schnürer, A.; Bertilsson, J. Methane Production in Dairy Cows Correlates with Rumen Methanogenic and Bacterial Community Structure. *Front. Microbiol.* **2017**, *8*. <https://doi.org/10.3389/fmicb.2017.00226>.
4. Denman, S. E.; Tomkins, N. W.; McSweeney, C. S. Quantitation and Diversity Analysis of Ruminal Methanogenic Populations in Response to the Antimethanogenic Compound Bromochloromethane: Monitoring of Rumen Methanogenic Archaea. *FEMS Microbiol Ecol* **2007**, *62* (3), 313–322. <https://doi.org/10.1111/j.1574-6941.2007.00394.x>.
5. Denman, S. E.; McSweeney, C. S. Development of a Real-Time PCR Assay for Monitoring Anaerobic Fungal and Cellulolytic Bacterial Populations within the Rumen: Real-Time PCR Assay of the Rumen Anaerobic Fungal Population. *FEMS Microbiol Ecol* **2006**, *58* (3), 572–582. <https://doi.org/10.1111/j.1574-6941.2006.00190.x>.
6. Karnati, S. K. R.; Yu, Z.; Sylvester, J. T.; Dehority, B. A.; Morrison, M.; Firkins, J. L. Technical Note: Specific PCR Amplification of Protozoal 18S rDNA Sequences from DNA Extracted from Ruminal Samples of Cows. *J Anim Sci* **2003**, *81* (3), 812–815. <https://doi.org/10.2527/2003.813812x>.
